# Supplementary material for: Theoretical study of the structural and thermodynamic properties of U–He compounds under high pressure
Source: Royal Society of Chemistry journal article supplement (doi:10.1039/d4cp02037e), 2024-01-01
Supplement: d4cp02037e1.pdf [file d4cp02037e1.pdf]

Supporting Information

*for*

**Theoretical Study on the Structural and Thermodynamic  
Properties of U-He compounds under High Pressure**

Ye Cao,<sup>a</sup> Hongxing Song,<sup>\*a</sup> Xiaozhen Yan,<sup>a</sup> Hao Wang,<sup>a</sup> Yufeng Wang,<sup>a</sup> Fengchao  
Wu,<sup>a</sup> Leilei Zhang,<sup>a</sup> Qiang Wu<sup>\*a</sup> and Huayun Geng<sup>\*ab</sup>

<sup>a</sup> National Key Laboratory of Shock Wave and Detonation Physics, Institute of Fluid  
Physics, China Academy of Engineering Physics, Mianyang, Sichuan 621900, P. R.  
China;

<sup>b</sup> HEDPS, Center for Applied Physics and Technology, and College of Engineering,  
Peking University, Beijing 100871, P. R. China

**Corresponding Authors:**

hxsong555@163.com (Hong X. Song);

wuqianglsd@163.com (Qiang Wu);

hygeng@outlook.com (Hua Y. Geng)

**Table S1.** Crystal structure information of  $Fmmm$ -U<sub>4</sub>He and  $P\bar{1}$ -U<sub>6</sub>He at 150 GPa.

| Phase             | Space group | Lattice parameters             | Atom | Fractional coordinates |       |        | Wyckoff  |
|-------------------|-------------|--------------------------------|------|------------------------|-------|--------|----------|
|                   |             |                                |      | x                      | y     | z      | Position |
| U <sub>4</sub> He | $Fmmm$      | a=10.320 Å                     | U1   | 0.664                  | 0.500 | -0.165 | 16n      |
|                   |             | b=3.434 Å                      | U5   | 0.341                  | 0.500 | -0.500 | 8g       |
|                   |             | c=13.017 Å                     | U7   | 0.500                  | 0.500 | -0.346 | 8i       |
|                   |             | $\alpha=\beta=\gamma=90^\circ$ | He1  | 0.936                  | 0.500 | -0.500 | 8g       |
| U <sub>6</sub> He | $P\bar{1}$  | a=2.746 Å                      |      |                        |       |        |          |
|                   |             | b=4.481 Å                      | U1   | 0.533                  | 0.676 | 0.716  | 2i       |
|                   |             | c=7.023 Å                      | U2   | 0.801                  | 0.853 | 0.353  | 2i       |
|                   |             | $\alpha=100.0^\circ$           | U4   | 0.819                  | 0.241 | 0.964  | 2i       |
|                   |             | $\beta=92.3^\circ$             | He1  | 0.000                  | 0.500 | 0.500  | 1g       |
|                   |             | $\gamma=90.7^\circ$            |      |                        |       |        |          |

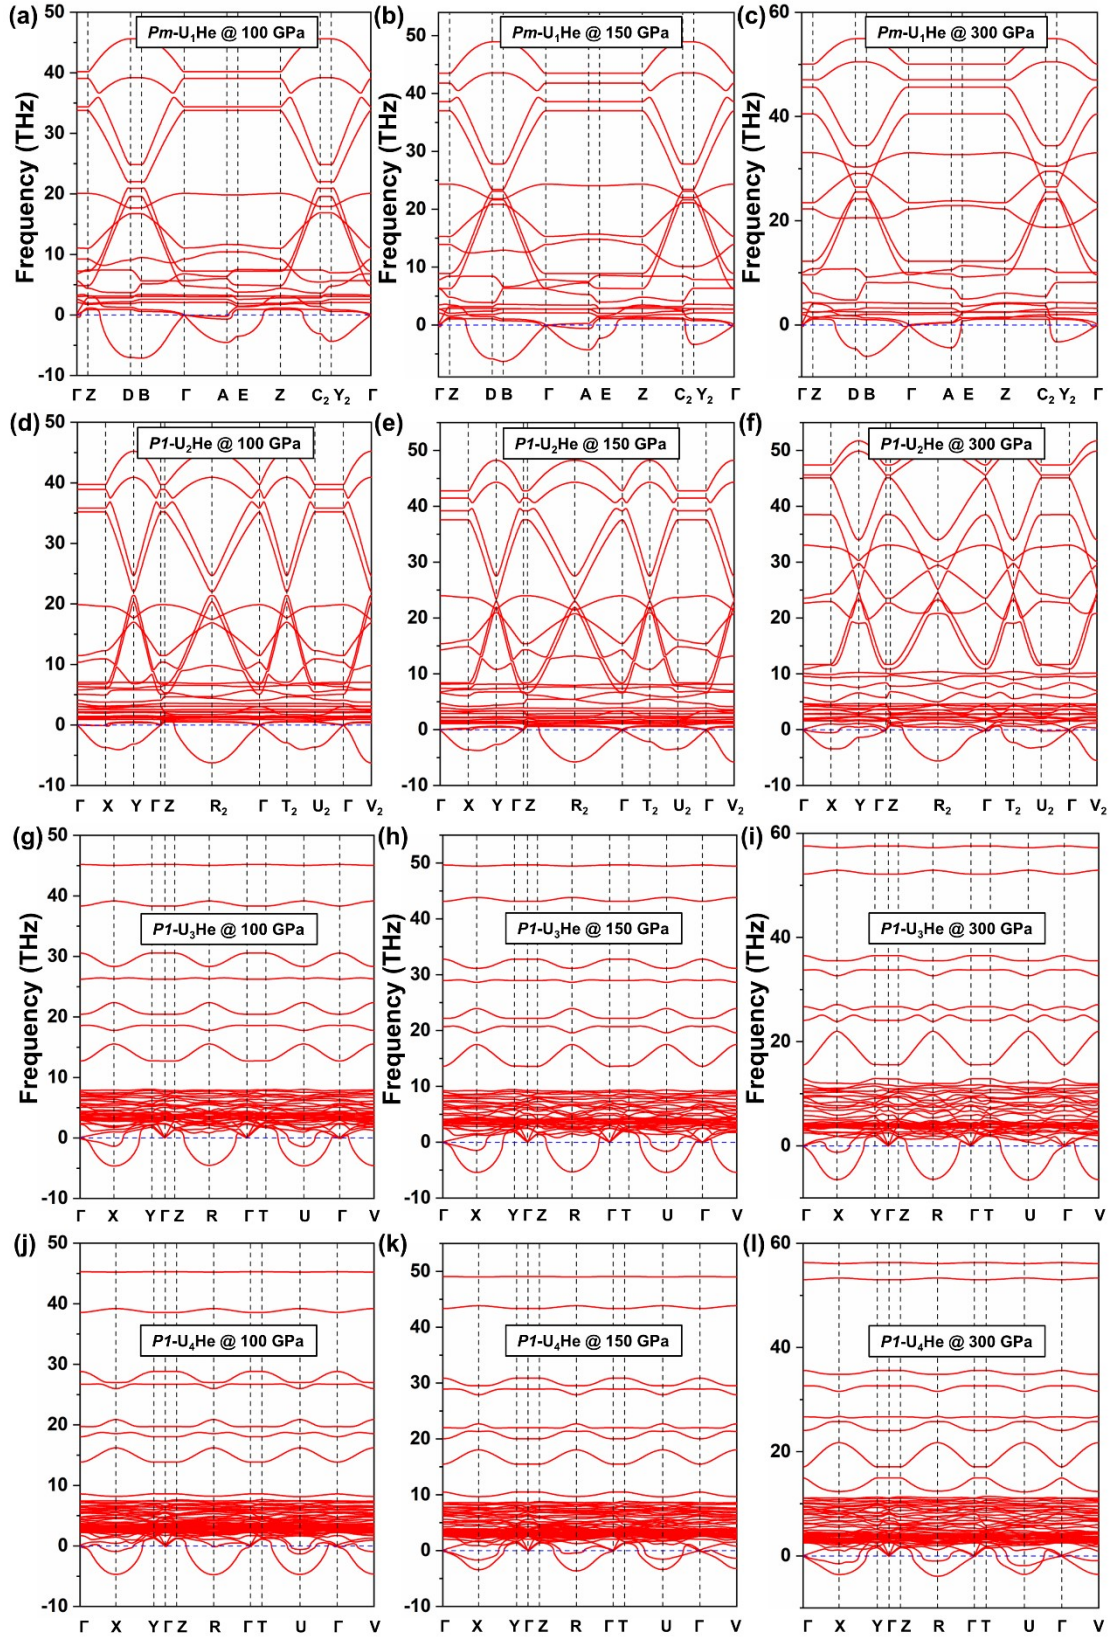

**Fig. S1.** The phonon dispersion spectra at 100, 150, and 300 GPa of (a)-(c) *Pm*-UHe, (d)-(f) *P1*-U<sub>2</sub>He, (g)-(i) *P1*-U<sub>3</sub>He and (j)-(l) *P1*-U<sub>4</sub>He, respectively.

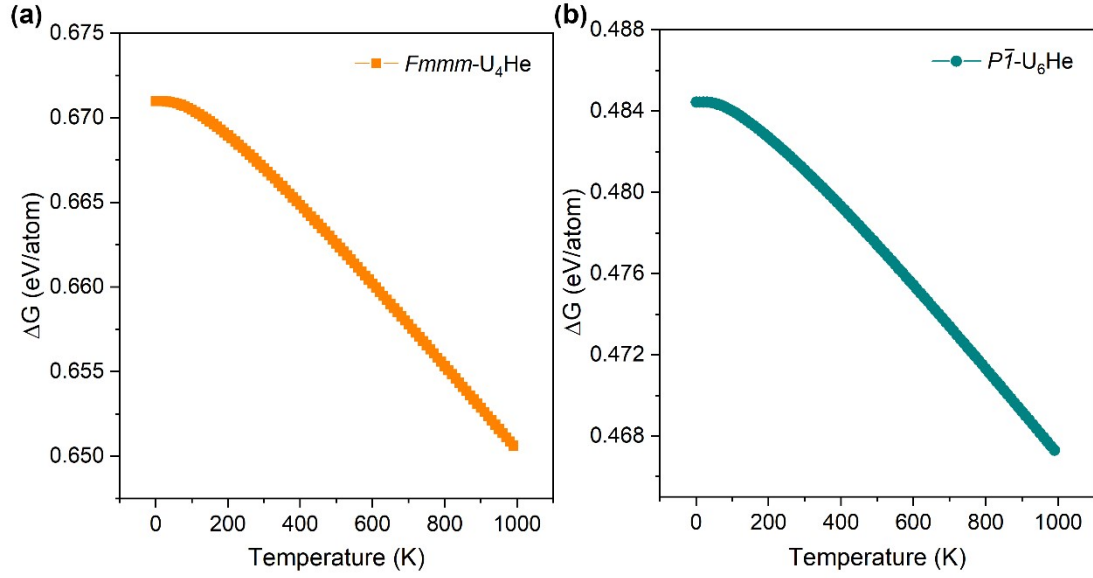

**Fig. S2.** Gibbs free energy of (a)  $Fmmm-U_4He$  and (b)  $P\bar{1}-U_6He$  within quasi-harmonic approximation (QHA) at 150 GPa.

Under the quasi-harmonic approximation (QHA),<sup>1</sup> the Gibbs free energy of  $Fmmm-U_4He$  can be expressed as:

$$\Delta G = \frac{G(U_nHe) - nG(U) - G(He)}{n + 1} \quad (1)$$

where  $G(U)$  and  $G(He)$  represented the Gibbs free energy of the most stable structure of element uranium ( $\alpha-U$ ) and helium ( $hcp-He$ ), respectively.

**Table S2.** Bader charge (in e) of  $Fmmm$ -U<sub>4</sub>He and  $P\bar{1}$ -U<sub>6</sub>He at 150 GPa.

| $Fmmm$ -U <sub>4</sub> He |        |        |        |        |        |
|---------------------------|--------|--------|--------|--------|--------|
|                           | U1     | U2     | U3     | U4     | U5     |
| Charge                    | +0.023 | +0.023 | +0.029 | +0.029 | -0.253 |
|                           | U6     | U7     | U8     | He1    | He2    |
| Charge                    | -0.253 | +0.083 | +0.083 | +0.118 | +0.118 |

  

| $P\bar{1}$ -U <sub>6</sub> He |        |        |        |        |        |
|-------------------------------|--------|--------|--------|--------|--------|
|                               | U1     | U2     | U3     | U4     | U5     |
| Charge                        | -0.127 | +0.062 | +0.062 | -0.008 | -0.008 |
|                               | U6     | He1    |        |        |        |
| Charge                        | -0.127 | +0.147 |        |        |        |

**Table S3.** The calculated independent elastic constants  $C_{ij}$ , bulk modulus  $B$ , shear modulus  $G$ , Young's modulus  $E$  (in GPa), Poisson's ratio  $\nu$ , and longitudinal  $v_l$ , transverse  $v_t$ , average sound velocities  $v_m$  (in m/s), Debye temperature  $\theta_D$  (in K), and  $B/G$  of  $\alpha$ -U under 0 and 100 GPa, as well as experimental data and other theoretical calculations.

| Pressure (GPa)            | $C_{11}$ | $C_{22}$ | $C_{33}$ | $C_{44}$ | $C_{55}$ | $C_{66}$ | $C_{12}$ | $C_{13}$   | $C_{23}$ |
|---------------------------|----------|----------|----------|----------|----------|----------|----------|------------|----------|
| 0 (Expt. <sup>2</sup> )   | 215      | 199      | 267      | 124      | 73       | 74       | 46       | 22         | 108      |
| 0 (Calc. <sup>3</sup> )   | 296      | 216      | 367      | 153      | 129      | 99       | 60       | 29         | 141      |
| 0 (Calc. <sup>4</sup> )   | 295      | 215      | 347      | 143      | 130      | 102      | 68       | 25         | 149      |
| 0 (Calc. <sup>5</sup> )   | 287      | 220      | 352      | 151      | 117      | 101      | 66       | 28         | 152      |
| 0                         | 300.0    | 226.2    | 361.5    | 155.0    | 126.2    | 99.2     | 60.1     | 27.3       | 138.9    |
| 100 (Calc. <sup>5</sup> ) | 1165     | 770      | 1020     | 355      | 293      | 310      | 224      | 167        | 453      |
| 100                       | 1153.1   | 758.5    | 1108.7   | 367.7    | 312.3    | 309.4    | 209.9    | 200.5      | 428.8    |
| Pressure (GPa)            | $B$      | $G$      | $E$      | $\nu$    | $v_l$    | $v_t$    | $v_m$    | $\theta_D$ | $B/G$    |
| 0 (Expt. <sup>2</sup> )   | 115      | 87       |          | 0.20     |          |          |          | 251        | 1.322    |
| 0 (Calc. <sup>3</sup> )   | 149      | 108      | 261      | 0.21     |          |          |          | 287        | 1.380    |
| 0 (Calc. <sup>4</sup> )   | 147      | 108      | 261      | 0.204    |          |          |          | 284        | 1.357    |
| 0 (Calc. <sup>5</sup> )   | 148      | 107      | 259      | 0.207    | 3846     | 2338     | 2583     | 283        | 1.383    |
| 0                         | 146.6    | 114.1    | 271.8    | 0.191    | 3893.1   | 2406.0   | 2653.6   | 290.8      | 1.285    |
| 100 (Calc. <sup>5</sup> ) | 513      | 320      | 795      | 0.242    | 5895     | 3439     | 3815     | 464        | 1.603    |
| 100                       | 515.6    | 333.2    | 822.4    | 0.234    | 5959.5   | 3511.3   | 3897.1   | 473.7      | 1.547    |

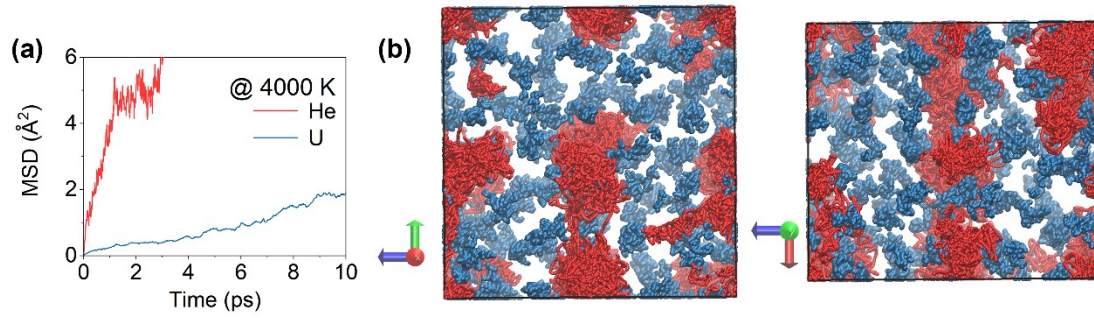

**Fig. S3.** (a) The calculated mean squared displacement (MSD) and (b) the trajectories of U (red) and He (blue) atoms in  $Fmmm-U_4He$  at 4000 K.

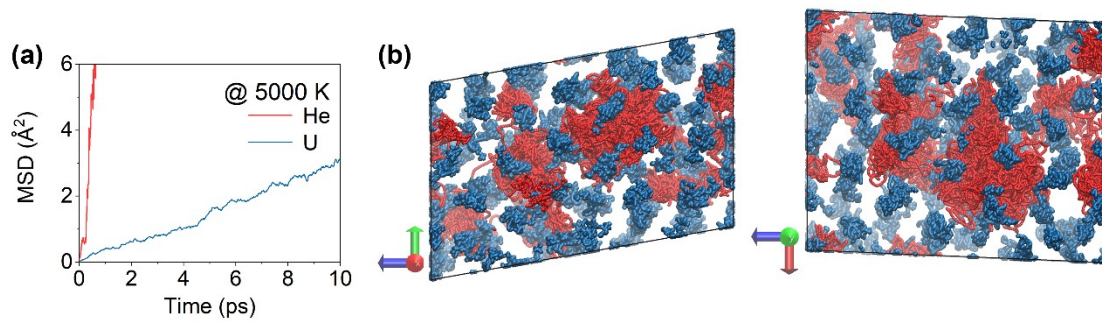

**Fig. S4.** (a) The calculated mean squared displacement (MSD) and (b) the trajectories of U (red) and He (blue) atoms in  $P\bar{1}$ - $U_6\text{He}$  at 5000 K.



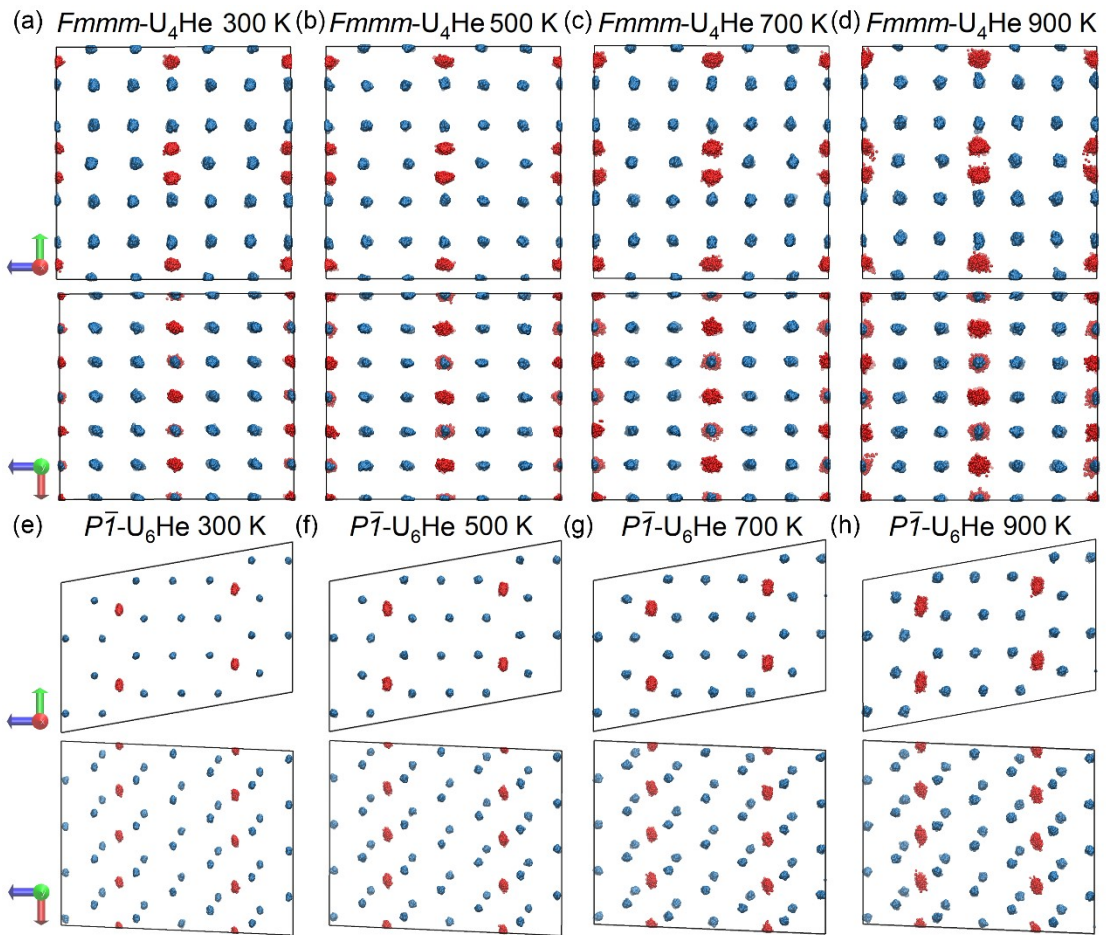

**Fig. S5.** The trajectories of He (red) and U (blue) atoms of (a)-(d)  $Fm\bar{3}m$ -U<sub>4</sub>He and (e)-(h)  $P\bar{1}$ -U<sub>6</sub>He at 300, 500, 700 and 900 K.

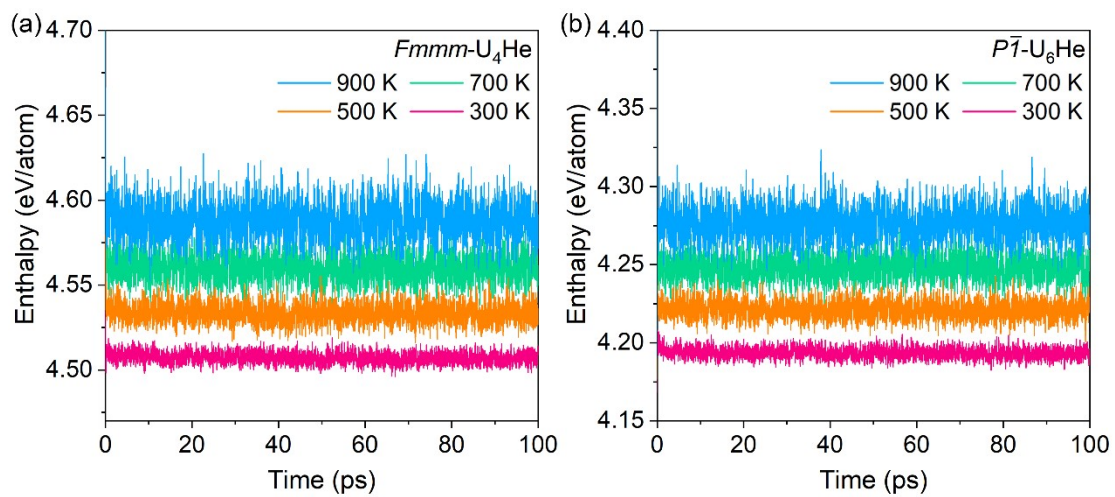

**Fig. S6.** The evolution of enthalpy with time of (a)  $Fmmm-U_4He$  and (b)  $P\bar{1}-U_6He$  at 300, 500, 700 and 900 K.

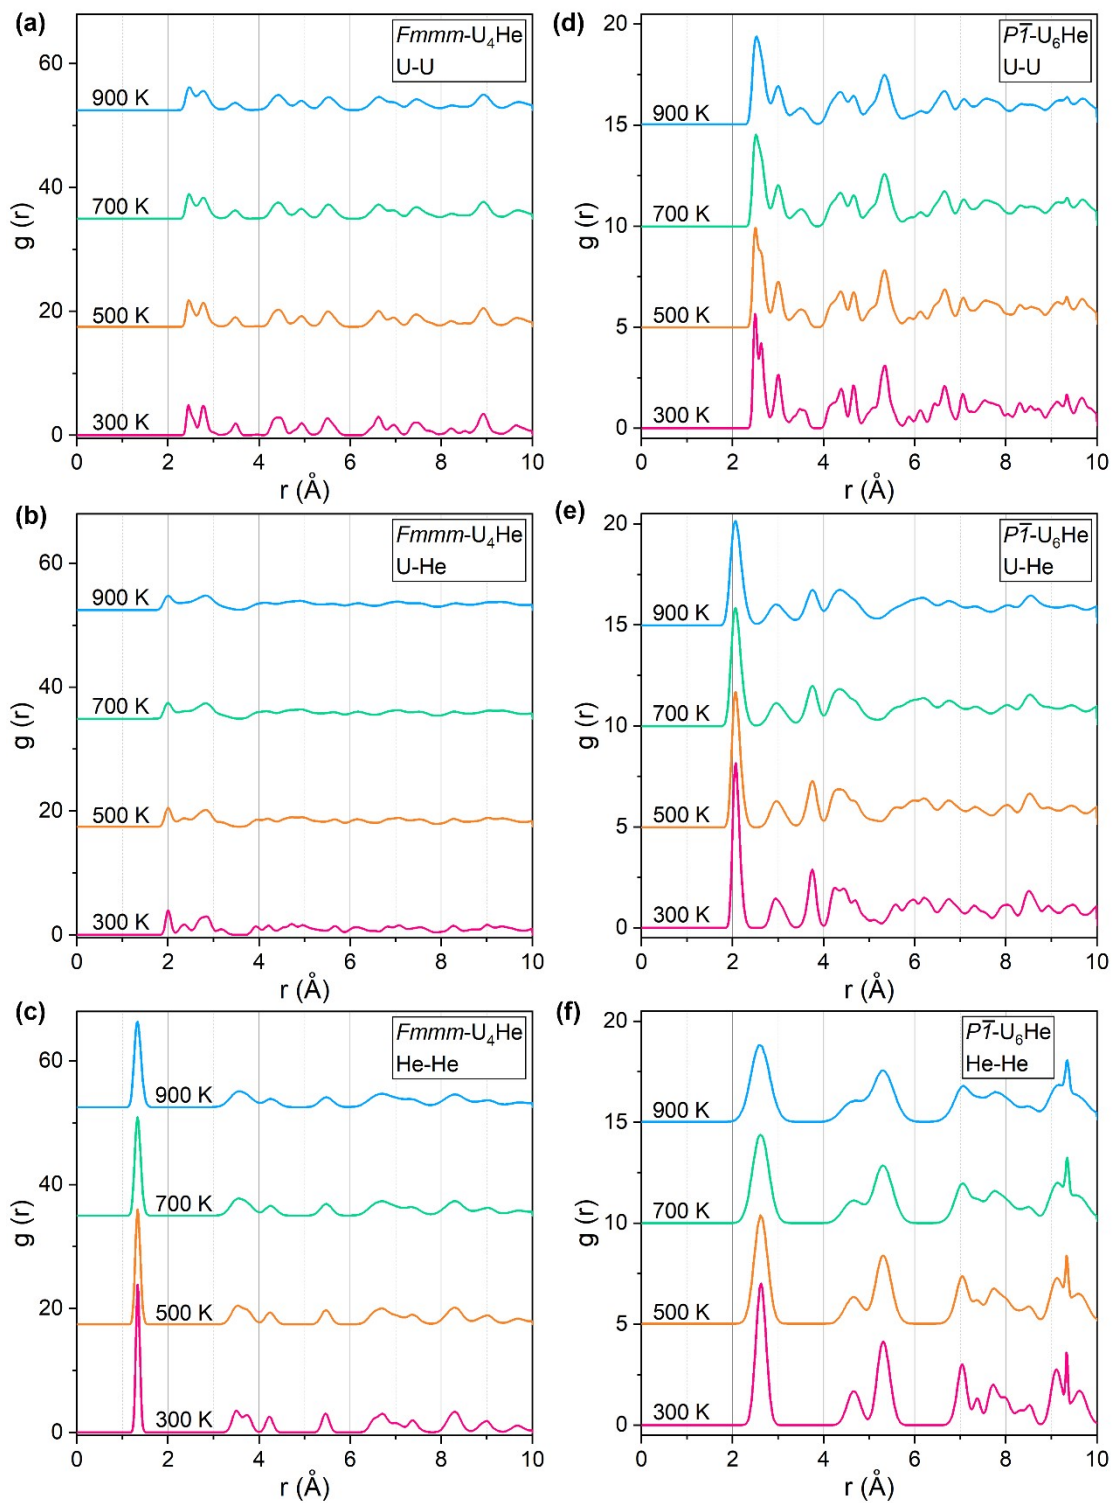

**Fig. S7.** The radial distribution function of (a)-(c)  $Fmmm-U_4He$  and (d)-(f)  $P7-U_6He$  at select temperature.

## References

- 1 A. Togo, L. Chaput, I. Tanaka and G. Hug, First-principles phonon calculations of thermal expansion in  $\text{Ti}_3\text{SiC}_2$ ,  $\text{Ti}_3\text{AlC}_2$ , and  $\text{Ti}_3\text{GeC}_2$ , *Phys. Rev. B*, 2010, **81**, 174301.
- 2 E. S Fisher and H. J. McSkimin, Adiabatic elastic moduli of single crystal alpha-uranium, *J. Appl. Phys.*, 1958, **29**, 1473-1484.
- 3 C. D. Taylor, Evaluation of first-principles techniques for obtaining materials parameters of  $\alpha$ -uranium and the (001)  $\alpha$ -uranium surface, *Phys. Rev. B*, 2009, **80**, 149906.
- 4 J. W. Yang, T. Gao, B. Q. Liu, G. A. Sun and B. Chen, Structure and elastic anisotropy of uranium under pressure up to 100 GPa, *Eur Phys. J. B*, 2014, **87**, 130.
- 5 H. J. Zhang, S. N. Li, J. J. Zheng, W. D. Li and B. T. Wang, Effects of pressure on structural, electronic, and mechanical properties of,  $\alpha$ ,  $\beta$  and  $\gamma$  uranium, *Chin. Phys. B*, 2017, **26**, 066104.
